# Supplementary material
Source: publisher figshare collection journal article supplement (https://gsajournals.figshare.com/ndownloader/files/18536444)
Supplement: Supplementary file 1 [file 18536444]

## Sheet: Supplemental Table S6
Supplemental Table S6. Population structure analysis of the Wisconsin Diversity panel. Included in the table are the first three principal components (PCs) calculated from the SNP genotype matrix (PC1, PC2, and PC3), assignment value (Q) for each subpopulation (subpopulations 1 to 6), group classification of lines following assignments of Hansey et al. (2011), subpopulation with the highest assig…
Maize inbred line	PC1	PC2	PC3	Subpopulation1	Subpopulation2	Subpopulation3	Subpopulation4	Subpopulation5	Subpopulation6	Group	K	Q-value	Category
A	7.71049	40.5074	-65.9977	0	0	0	0.999998	0	0	NSS	4	0.999998	Subpop.4
A12	30.7644	-23.7242	-5.40205	0	0.0133	0.317609	0.362635	0.265825	0.040631	NSS	4	0.362635	Admixed
A15	36.5713	-22.3858	-9.05222	0	0	0.260926	0.388632	0.343795	0.006646	NSS	4	0.388632	Admixed
A155	43.3295	-5.29271	5.68064	0	0.150679	0.265812	0.336615	0.246893	0	Unknown	4	0.336615	Admixed
A171	39.7355	-22.0081	-4.79703	0.002409	0.022871	0.310318	0.325989	0.333112	0.005301	Unknown	5	0.333112	Admixed
A188	43.1786	-28.4047	-4.20109	0	0	0.310613	0.318196	0.370595	0.000595	Unknown	5	0.370595	Admixed
A239	20.634	23.0208	-62.4677	0	0	0	0.999998	0	0	Unknown	4	0.999998	Subpop.4
A258	19.0624	20.1299	-56.9943	0	0	0	0.999998	0	0	NSS	4	0.999998	Subpop.4
A305	37.1885	-26.785	-5.22523	0	0.010262	0.249489	0.344202	0.396046	0	Unknown	5	0.396046	Admixed
A321	9.73557	41.9696	-71.5428	0	0	0	0.999998	0	0	NSS	4	0.999998	Subpop.4
A322	34.0775	-14.6497	-15.3262	0	0	0.210437	0.409139	0.370758	0.009665	Unknown	4	0.409139	Admixed
A334	28.1842	-14.9011	-9.40525	0.000489	0.011744	0.204364	0.414282	0.343137	0.025983	Unknown	4	0.414282	Admixed
A340	44.2483	-31.8183	-4.88172	0	0.003896	0.332519	0.339506	0.324078	0	Not available	4	0.339506	Admixed
A374	8.77512	41.319	-61.5787	0	0	0	0.999998	0	0	NSS	4	0.999998	Subpop.4
A385	31.5736	-25.8337	-4.84398	0	0	0.259103	0.437697	0.303199	0	NSS	4	0.437697	Admixed
A401	23.9534	-11.4849	-28.264	0	0	0.144658	0.663197	0.192143	0	NSS	4	0.663197	Subpop.4
A415_1_3_INBRED	41.3468	-38.0917	-5.80008	0	0	0.242812	0.186576	0.570611	0	Unknown	5	0.570611	Subpop.5
A427	25.1934	3.63388	-18.4158	0	0	0.196225	0.450491	0.318297	0.034987	Unknown	4	0.450491	Admixed
A554	31.5281	3.18081	-6.82049	0	0.072762	0.193753	0.541364	0.190621	0.001501	NSS	4	0.541364	Subpop.4
A572	40.4625	-20.9721	-3.99231	0	0	0.290476	0.384054	0.325469	0	Unknown	4	0.384054	Admixed
A627	24.9241	8.14297	-23.238	0.000656	0.034749	0.116514	0.635287	0.205587	0.007207	NSS	4	0.635287	Subpop.4
A632	-238.527	-84.5988	111.224	0	0	0	0	0	0.999998	SSS	6	0.999998	Subpop.6
A635	-239.814	-77.4362	104.465	0	0	0	0	0	0.999998	SSS	6	0.999998	Subpop.6
A648	24.5332	19.4104	-30.1867	0	0.081941	0.065409	0.825193	0.024788	0.002669	NSS	4	0.825193	Subpop.4
A649	16.8936	20.5118	-50.2501	0	0	0.004359	0.99564	0	0	NSS	4	0.99564	Subpop.4
A651	45.1864	-4.35717	-32.5565	0	0	0.312238	0.687761	0	0	NSS	4	0.687761	Subpop.4
A659	14.011	19.2179	-28.3444	0	0.045723	0	0.908146	0.028672	0.017458	NSS	4	0.908146	Subpop.4
A661	30.7236	-16.6407	-6.65321	0	0	0.2568	0.446809	0.29639	0	Unknown	4	0.446809	Admixed
A662	41.0781	-16.0114	-5.69798	0.00179	0.051541	0.297059	0.345106	0.304504	0	Not available	4	0.345106	Admixed
A663	28.1521	-0.800725	-18.4262	0	0	0.198784	0.416158	0.354423	0.030634	Unknown	4	0.416158	Admixed
A673	33.8279	-13.8134	-11.7039	0	0.022799	0.311299	0.474384	0.181903	0.009615	Unknown	4	0.474384	Admixed
A674	-9.08644	-44.2137	21.447	0	0	0.3028	0.183309	0.31056	0.20333	Unknown	5	0.31056	Admixed
A679	-165.001	8.68112	-123.918	0	0	0	0	0	0.999998	SSS	6	0.999998	Subpop.6
A680	-202.89	14.5253	-133.077	0	0	0	0	0	0.999998	SSS	6	0.999998	Subpop.6
A682	35.088	76.5639	147.411	0	0.923577	0	0.031607	0	0.044815	NSS	2	0.923577	Subpop.2
A71	17.6397	23.7407	-45.428	0	0	0	0.915851	0.084147	0	NSS	4	0.915851	Subpop.4
A73	20.8213	29.9095	-62.3173	0	0	0	0.999998	0	0	NSS	4	0.999998	Subpop.4
A797NW	35.3733	-32.0521	-2.843	0	0.000905	0.121286	0.230044	0.637969	0.009796	Unknown	5	0.637969	Subpop.5
ABP15	32.0656	-13.6836	-12.1989	0	0.02757	0.2252	0.46362	0.28361	0	Not available	4	0.46362	Admixed
AR228	39.238	-32.051	-1.91457	0	0	0.146223	0.259819	0.593957	0	Unknown	5	0.593957	Subpop.5
AUSTRCF_306238	45.376	33.0085	95.0314	0	0.655052	0.142905	0.202042	0	0	NSS	2	0.655052	Subpop.2
B_18_INBR_FR_SUPERGOLD	62.3751	-87.5583	-14.3284	0	0	0.999998	0	0	0	Popcorn	3	0.999998	Subpop.3
B_28	59.0988	-63.6412	-2.71813	0	0	0.844539	0.15546	0	0	Unknown	3	0.844539	Subpop.3
B10	-101.6	5.28502	-37.3419	0.000598	0	0	0.471948	0.020798	0.506655	SSS	6	0.506655	Subpop.6
B101	-70.4058	-7.37901	-36.2564	0	0	0.066739	0.399639	0.142818	0.390804	SSS	4	0.399639	Admixed
B103	-35.4123	128.509	0.355045	0.820941	0.03438	0	0	0	0.144678	Unknown	1	0.820941	Subpop.1
B104	-148.693	11.7647	-67.8045	0	0	0	0.266813	0	0.733185	SSS	6	0.733185	Subpop.6
B105	-76.131	11.4148	-61.868	0	0	0.000197	0.532183	0.052169	0.41545	SSS	4	0.532183	Subpop.4
B106	44.3772	16.5504	45.9378	0	0.364656	0.18143	0.230566	0.223347	0	SSS	2	0.364656	Admixed
B107	-31.6146	164.954	-10.5989	0.999998	0	0	0	0	0	Unknown	1	0.999998	Subpop.1
B108	15.9236	-16.6254	10.5619	0	0.103461	0.086079	0.211129	0.507938	0.091393	Unknown	5	0.507938	Subpop.5
B109	-200.254	10.3796	-113.722	0	0	0	0	0	0.999998	SSS	6	0.999998	Subpop.6
B110	-130.506	21.6308	-75.73	0	0	0	0.34232	0	0.657679	SSS	6	0.657679	Subpop.6
B111	-86.7653	13.6972	-52.5213	0	0	0	0.532295	0	0.467704	SSS	4	0.532295	Subpop.4
B113	21.5094	-1.23859	-7.13742	0.013728	0.044625	0.115976	0.450351	0.335541	0.039779	Unknown	4	0.450351	Admixed
B114	-31.0397	165.7	-9.08055	0.999998	0	0	0	0	0	Unknown	1	0.999998	Subpop.1
B115	25.0761	-10.4394	-0.789162	0.000332	0.060642	0.232727	0.420239	0.286059	0	Unknown	4	0.420239	Admixed
B119	-134.088	13.5653	-70.315	0	0	0	0.328317	0	0.671682	SSS	6	0.671682	Subpop.6
B120	26.745	39.8319	-45.0746	1e-05	0	0	0.999989	0	0	NSS	4	0.999989	Subpop.4
B121	24.2008	30.1007	-45.2504	0	0	0	0.999998	0	0	SSS	4	0.999998	Subpop.4
B14	-294.415	-84.61	113.784	0	0	0	0	0	0.999998	Not available	6	0.999998	Subpop.6
B14A	-290.585	-83.5821	112.409	0	0	0	0	0	0.999998	SSS	6	0.999998	Subpop.6
B164	-1.81605	1.05194	-31.9977	0	0	0.078722	0.630012	0.187239	0.104026	Unknown	4	0.630012	Subpop.4
B2	1.68383	8.64557	-26.9159	0	0.00293	0.055591	0.664741	0.193583	0.083156	NSS	4	0.664741	Subpop.4
B37	-109.482	61.6628	-38.0625	0.340991	0	0	0	0	0.659007	SSS	6	0.659007	Subpop.6
B42	20.8133	12.5083	-26.7405	0	0.033787	0.175949	0.771717	0	0.018546	NSS	4	0.771717	Subpop.4
B52	10.0346	29.1616	-17.535	0	0.102472	0	0.732857	0.115446	0.049224	Unknown	4	0.732857	Subpop.4
B54	24.8835	8.94432	-22.3256	0	0.061891	0	0.775321	0.158967	0.00382	NSS	4	0.775321	Subpop.4
B64	-207.899	-79.3234	93.3844	0	0	0	0	0	0.999998	SSS	6	0.999998	Subpop.6
B66	43.2882	49.4613	37.2616	0	0.582383	0.104153	0.229546	0.083917	0	Unknown	2	0.582383	Subpop.2
B68	-250.946	-81.6479	112.335	0	0	0	0	0	0.999998	SSS	6	0.999998	Subpop.6
B7	-2.18025	23.465	-37.9688	0.083781	0	0.059805	0.660937	0.113604	0.081873	NSS	4	0.660937	Subpop.4
B73	-228.592	18.4398	-142.59	0	0	0	0	0	0.999998	Not available	6	0.999998	Subpop.6
B75	14.9877	22.5587	7.79145	0	0.248608	0.029832	0.535448	0.134243	0.051869	NSS	4	0.535448	Subpop.4
B77	30.6519	-14.7333	12.7578	0	0.107728	0.155576	0.280293	0.427656	0.028747	Unknown	5	0.427656	Admixed
B79	-48.568	14.1975	12.5482	0	0.174733	0	0.53098	0	0.294286	Unknown	4	0.53098	Subpop.4
B8	35.8561	-26.2688	1.49751	0	0.010531	0.302843	0.349916	0.334199	0.002511	Unknown	4	0.349916	Admixed
B84	-150.03	8.97749	-81.3447	0	0	0	0.223234	0	0.776765	SSS	6	0.776765	Subpop.6
B85	36.4191	22.1778	17.0114	0	0.281929	0.136054	0.40354	0.178476	0	Unknown	4	0.40354	Admixed
B87	14.3677	18.2544	22.7536	0	0.268423	0.098345	0.444382	0.112958	0.075891	Unknown	4	0.444382	Admixed
B88	-19.5185	17.0451	-45.0729	0	0	0.028654	0.779296	0	0.192049	Unknown	4	0.779296	Subpop.4
B90	28.9146	22.7757	-49.4172	0	0	0	0.963781	0.036218	0	NSS	4	0.963781	Subpop.4
B91	24.6721	30.9941	-48.972	0	0	0	0.999998	0	0	NSS	4	0.999998	Subpop.4
B97	24.8053	30.3508	-52.5567	0	0	0	0.999998	0	0	NSS	4	0.999998	Subpop.4
B99	31.5868	30.0204	-46.6537	0	0	0	0.999998	0	0	NSS	4	0.999998	Subpop.4
C102	47.8298	-24.872	32.3553	0	0.1697	0.354439	0.188913	0.286574	0.000373	NSS	3	0.354439	Admixed
C103	59.0168	65.3254	187.677	0	0.999998	0	0	0	0	NSS	2	0.999998	Subpop.2
C123	57.7977	27.3669	122.66	0	0.696159	0.169743	0	0.134096	0	NSS	2	0.696159	Subpop.2
C42	62.2078	-68.8535	24.7869	0	0	0.999998	0	0	0	Sweet Corn	3	0.999998	Subpop.3
C49A	35.3922	-19.9031	-1.723	0	0.004041	0.32325	0.397878	0.266661	0.008171	NSS	4	0.397878	Admixed
C68	53.5895	-55.2066	7.52974	0	0.019091	0.675793	0.163763	0.141352	0	Sweet Corn	3	0.675793	Subpop.3
CG10	32.3922	-16.3364	-14.5436	0	0	0.236263	0.485666	0.268229	0.009842	Unknown	4	0.485666	Admixed
CH157	9.73032	1.21586	-24.5406	0	0.004217	0.091365	0.612001	0.229945	0.062472	Unknown	4	0.612001	Subpop.4
CH701_30	21.6615	2.11496	-16.3474	0	0.025492	0.130109	0.630792	0.188544	0.025062	Unknown	4	0.630792	Subpop.4
CH753_4	-226.346	-73.1726	98.2951	0	0	0	0	0	0.999998	Unknown	6	0.999998	Subpop.6
CH9	25.896	22.6752	-23.6365	0	0.033877	0.031644	0.751713	0.182766	0	Unknown	4	0.751713	Subpop.4
CHI_TAN_120	21.1412	0.548609	-12.5757	0	0.043396	0.125443	0.503841	0.290641	0.036679	Unknown	4	0.503841	Subpop.4
CI_21E	-21.5643	10.1932	-47.0914	0.00353	0	0	0.627329	0.204315	0.164824	Unknown	4	0.627329	Subpop.4
CI_28A	21.0347	23.5909	-62.9124	0	0	0	0.999998	0	0	Unknown	4	0.999998	Subpop.4
CI_3A	15.4042	-16.0765	-3.19727	0	0	0.185566	0.450129	0.292474	0.071831	Unknown	4	0.450129	Admixed
CI_40H	9.05649	12.8741	-37.3405	0	0	0.051055	0.805246	0.10281	0.040888	Unknown	4	0.805246	Subpop.4
CI_64	39.3717	-31.9145	-2.78152	0	0.001601	0.076101	0.194257	0.72804	0	Unknown	5	0.72804	Subpop.5
CI_91B	33.1072	-8.92865	-18.1237	0	0.013921	0.047211	0.473515	0.465352	0	Unknown	4	0.473515	Admixed
CI_92	42.5195	-28.9255	-3.055	0	0.013864	0.195405	0.239324	0.551406	0	Not available	5	0.551406	Subpop.5
CI31A	27.3668	-15.6142	-13.6569	0	0.008778	0.156888	0.377354	0.424867	0.032112	Midland	5	0.424867	Admixed
CI90C_GOODMAN_BUCKLER	34.4307	0.599545	-7.03453	0	0.150359	0	0.4267	0.42294	0	Not available	4	0.4267	Admixed
CL17	42.4595	-45.7559	5.71355	0	0.003314	0.60641	0.267668	0.107451	0.015157	Unknown	3	0.60641	Subpop.3
CL18	42.3846	-45.7731	5.38802	0	0.001447	0.608976	0.263418	0.110726	0.015433	Unknown	3	0.608976	Subpop.3
CL27	46.4323	-43.6948	11.0993	0	0	0.50515	0.251538	0.24331	0	Unknown	3	0.50515	Subpop.3
CM105	-186.492	-79.4865	101.202	0	0	0	0	0	0.999998	SSS	6	0.999998	Subpop.6
CM174	-189.58	-83.2898	102.699	0	0	0	0	0	0.999998	SSS	6	0.999998	Subpop.6
CM48	39.2826	-56.4889	18.7729	0	0	0.649128	0.295986	0	0.054885	Semi Flint	3	0.649128	Subpop.3
CM7	38.2454	-33.1234	0.55807	0	0	0.381934	0.335842	0.270038	0.012186	Unknown	3	0.381934	Admixed
CM99	-189.917	-85.4924	105.975	0	0	0	0	0	0.999998	SSS	6	0.999998	Subpop.6
CML_144	42.2033	-40.9201	-7.94342	0	0.000331	0	0.06475	0.934918	0	Not available	5	0.934918	Subpop.5
CML_176	38.3945	-47.6838	-7.63572	0	0	0	0.00143	0.997092	0.001477	Not available	5	0.997092	Subpop.5
CML_218	47.85	-50.9885	-6.62976	0	0	0	0	0.999998	0	Tropical	5	0.999998	Subpop.5
CML_220	43.2997	-48.3945	-13.6366	0	0	0	0	0.999998	0	Tropical	5	0.999998	Subpop.5
CML_228	40.7269	-43.6778	-17.528	0	0	0	0	0.999998	0	Tropical	5	0.999998	Subpop.5
CML_247	43.1803	-44.8514	-12.7237	0	0	0	0	0.999998	0	Not available	5	0.999998	Subpop.5
CML_277	40.5315	-45.414	-14.6432	0	0	0	0	0.999998	0	Tropical	5	0.999998	Subpop.5
CML_322	26.0953	-45.1783	-7.75124	0	0	0	0	0.955294	0.044705	Tropical	5	0.955294	Subpop.5
CML_323	32.7063	-46.2668	-3.94573	0	0	0.041211	0	0.907693	0.051095	Tropical	5	0.907693	Subpop.5
CML_376	48.1357	-49.0429	-12.2351	0	0	0	0	0.999998	0	Not available	5	0.999998	Subpop.5
CML_52	41.3581	-44.498	-14.2941	0	0	0	0	0.999998	0	Tropical	5	0.999998	Subpop.5
CML_91	33.6354	-42.0618	-0.269151	0	0	0	0.0757	0.924299	0	Tropical	5	0.924299	Subpop.5
CO106	38.2251	-23.4091	-3.8207	0	0.026989	0.308109	0.371991	0.292911	0	Unknown	4	0.371991	Admixed
CO117	36.3033	-8.50132	-5.35118	0.016734	0.031529	0.25139	0.449859	0.250488	0	Unknown	4	0.449859	Admixed
CO125	30.1515	-16.899	-12.903	0	0.019672	0.214808	0.441735	0.323785	0	NSS	4	0.441735	Admixed
CO158	35.016	-2.53782	1.29204	0.025121	0.110083	0.228969	0.325531	0.298955	0.011341	Unknown	4	0.325531	Admixed
CO192	41.737	-37.2177	-12.5855	0	0	0.431163	0.320881	0.247955	0	Unknown	3	0.431163	Admixed
CO216	43.0051	-15.5565	0.846967	0.006512	0.067142	0.307192	0.325783	0.293371	0	Unknown	4	0.325783	Admixed
CO236	37.006	-29.5463	-5.13498	0	0.001031	0.311416	0.378193	0.30936	0	Unknown	4	0.378193	Admixed
CO237	35.8716	-16.0793	8.72361	0	0.099732	0.271971	0.350055	0.266313	0.011929	Unknown	4	0.350055	Admixed
CO245	44.067	-37.1967	-7.02268	0	0	0.399286	0.403215	0.197498	0	Unknown	4	0.403215	Admixed
CO255	58.1458	-64.3913	5.9299	0	0	0.636597	0.068986	0.294416	0	Unknown	3	0.636597	Subpop.3
CO256	-59.9181	36.1236	-38.6009	0.086562	0	0	0.564276	0.014693	0.334468	SSS	4	0.564276	Subpop.4
CO257	-93.9338	11.5055	-40.7948	0	0	0	0.489609	0	0.51039	SSS	6	0.51039	Subpop.6
CO258	-99.4392	22.0336	-56.7708	0	0	0	0.493527	0	0.506472	SSS	6	0.506472	Subpop.6
CR1HT	37.953	67.3138	115.855	0	0.781429	0.083933	0	0.134637	0	NSS	2	0.781429	Subpop.2
CSJ3	39.3605	-24.9697	-4.50187	0	0.001028	0.274402	0.42099	0.303579	0	Unknown	4	0.42099	Admixed
DE811	-139.663	-29.605	88.3194	0	0.166616	0	0	0.11444	0.718942	Unknown	6	0.718942	Subpop.6
E2558W	38.9245	-26.2737	-11.4803	0	0	0.069474	0.278619	0.651907	0	Unknown	5	0.651907	Subpop.5
EAST_028	32.4956	-18.3501	-20.7428	0	0	0.114754	0.521147	0.363284	0.000815	Unknown	4	0.521147	Subpop.4
ENG_LI_CHIH	36.4259	-23.5855	-11.1381	0	0.008474	0.19861	0.326648	0.45461	0.011657	Unknown	5	0.45461	Admixed
EP1	62.1197	-70.2876	10.2652	0	0	0.592871	0	0.407127	0	Semi Flint	3	0.592871	Subpop.3
F115	26.5685	-13.4555	-12.0874	0	0	0.232942	0.457846	0.278192	0.03102	Unknown	4	0.457846	Admixed
F2834T	42.7508	-45.137	-6.31804	0	0	0.114191	0	0.865961	0.019847	Tropical	5	0.865961	Subpop.5
F431	51.8051	-43.1113	-2.66573	0	0	0.403113	0.181365	0.415521	0	Unknown	5	0.415521	Admixed
F44	44.0197	-27.2128	-4.43557	0	0	0.163253	0.234758	0.601988	0	Unknown	5	0.601988	Subpop.5
F7	67.449	-76.0794	11.7415	0	0	0.777631	0	0.222368	0	Flint	3	0.777631	Subpop.3
FBHJ	-154.42	-34.046	35.9053	0.018574	0	0.072134	0	0.141845	0.767445	Not available	6	0.767445	Subpop.6
FC46	60.7469	-68.4092	11.1335	0	0	0.715112	0	0.284887	0	Flint	3	0.715112	Subpop.3
FR19	-114.454	-32.5668	54.5636	0.000158	0	0.062399	0.364776	0.017218	0.555449	SSS	6	0.555449	Subpop.6
G22_T122	52.4214	-57.5757	5.61886	0	0	0.819729	0.18	0	0.00027	Flint	3	0.819729	Subpop.3
G3_T5A	0.0436923	208.453	-56.5778	0.999998	0	0	0	0	0	Flint	1	0.999998	Subpop.1
G80	-109.88	47.9943	91.4143	0.096308	0.364186	0	0	0	0.539505	Unknown	6	0.539505	Subpop.6
GE54	27.2865	-22.2923	-4.03668	0.00026	0.024142	0.137436	0.324875	0.513287	0	Unknown	5	0.513287	Subpop.5
H110	-44.1779	-61.0627	33.5644	0	0.001436	0.153458	0.039138	0.476777	0.32919	Unknown	5	0.476777	Admixed
H113	6.40616	-10.4859	-39.0607	0	0	0	0.582813	0.350384	0.066801	Unknown	4	0.582813	Subpop.4
H114	-90.4375	26.8314	-8.16742	0.146501	0.145102	0.072499	0	0.082145	0.553752	Unknown	6	0.553752	Subpop.6
H121	34.8256	14.9222	-11.1925	0	0.118725	0	0.586434	0.294841	0	Unknown	4	0.586434	Subpop.4
H122W	-108.835	26.3392	-72.3178	0	0.258833	0.060325	0	0	0.680841	Unknown	6	0.680841	Subpop.6
H124W	37.9226	-14.8048	-0.709481	0	0.073267	0.125238	0.320745	0.475236	0.005513	Unknown	5	0.475236	Admixed
H14	45.3699	9.7775	28.0546	0.000267	0.310127	0.276504	0.252185	0.160916	0	Unknown	2	0.310127	Admixed
H49	18.4826	45.0891	-12.8781	0	0.123617	0	0.725355	0.150827	0.000201	NSS	4	0.725355	Subpop.4
H5	12.1791	45.5627	-72.5083	0	0	0	0.999998	0	0	Unknown	4	0.999998	Subpop.4
H52	19.45	19.409	-33.2792	0	0	0.002636	0.874211	0.123152	0	NSS	4	0.874211	Subpop.4
H71	29.8294	18.9769	-44.5791	0	8.7e-05	0	0.999911	0	0	NSS	4	0.999911	Subpop.4
H84	-72.1006	39.302	-19.3752	0.246913	0.070818	0	0	0.205293	0.476974	SSS	6	0.476974	Admixed
H8431	-155.976	-31.2511	25.1298	0	0	0.075689	0.154459	0	0.769851	SSS	6	0.769851	Subpop.6
H91	-273.983	-79.384	114.007	0	0	0	0	0	0.999998	SSS	6	0.999998	Subpop.6
H95	38.1169	49.1407	24.3255	0	0.557802	0	0.279629	0.162569	0	NSS	2	0.557802	Subpop.2
H96	-19.3339	20.2585	-57.4849	0.001772	0	0	0.686135	0.175102	0.136991	Unknown	4	0.686135	Subpop.4
H99	40.1779	44.6387	32.7161	0	0.490763	0.040664	0.288063	0.18051	0	Unknown	2	0.490763	Admixed
HBA1	-38.2387	-0.0969631	59.9513	0	0.215712	0	0.258936	0.236037	0.289313	Not available	6	0.289313	Admixed
HI26	-27.9692	-19.3197	5.7786	0	0.036297	0	0.344561	0.392059	0.227082	Unknown	5	0.392059	Admixed
HI28	22.4492	-47.0882	-5.22715	0	0	0	0	0.894737	0.105261	Unknown	5	0.894737	Subpop.5
HP301	62.4345	-89.6215	-14.8281	0	0	0.999998	0	0	0	Popcorn	3	0.999998	Subpop.3
HP72_11	61.592	-57.8322	11.1576	0.000385	0.110462	0.822859	0.066293	0	0	Popcorn	3	0.822859	Subpop.3
HUANYAO	50.8098	-58.7676	-12.2674	0	0	0	0	0.999998	0	Unknown	5	0.999998	Subpop.5
HUOBAI	44.5407	-49.4331	-12.7463	0	0	0.090445	0.10829	0.801263	0	Unknown	5	0.801263	Subpop.5
HY	-28.1372	30.5401	-61.249	0.018393	0	0	0.811181	0.008505	0.16192	NSS	4	0.811181	Subpop.4
I_205	-10.881	95.4884	-40.3938	0.462958	0.000582	0	0.488138	0	0.048321	Unknown	4	0.488138	Admixed
I159	-33.5419	30.5919	-40.2954	0.085426	0	0.029214	0.542947	0.11106	0.231352	Iodent	4	0.542947	Subpop.4
I29	54.6554	-69.3284	-2.59303	0	0	0.65187	0.087204	0.260925	0	Popcorn	3	0.65187	Subpop.3
IA453	59.0295	-64.0778	18.4993	0	0	0.950238	0.049761	0	0	Not available	3	0.950238	Subpop.3
IA5125B	48.4467	-46.153	-1.42765	0	0	0.691323	0.303932	0.004745	0	Sweet Corn	3	0.691323	Subpop.3
IB014	18.0355	165.252	-27.5458	0.931814	0.068184	0	0	0	0	Not available	1	0.931814	Subpop.1
IB02	14.5115	151.651	-33.9145	0.999998	0	0	0	0	0	Not available	1	0.999998	Subpop.1
IDS28	58.5712	-61.8478	-8.1778	0.005465	0	0.83407	0.160464	0	0	Unknown	3	0.83407	Subpop.3
IDS69	63.2062	-84.8573	-12.4098	0	0	0.999998	0	0	0	Popcorn	3	0.999998	Subpop.3
IL_101T	62.884	-76.7119	21.4794	0	0	0.999998	0	0	0	Sweet Corn	3	0.999998	Subpop.3
IL14H	50.8692	-68.9637	18.9541	0	0	0.95803	0.041968	0	0	Sweet Corn	3	0.95803	Subpop.3
IL778D	43.615	-42.6489	0.147033	0	0	0.66064	0.272917	0.05415	0.012293	Sweet Corn	3	0.66064	Subpop.3
INBRED_100	49.6211	-36.4743	-9.82542	0.008419	0.019534	0.132229	0	0.839817	0	Unknown	5	0.839817	Subpop.5
INBRED_109	40.1398	-36.9787	-9.13164	0	0	0.113611	0.159349	0.727038	0	Unknown	5	0.727038	Subpop.5
INBRED_141	20.1609	-14.3482	-19.2679	0	0	0.195762	0.436627	0.314081	0.05353	Unknown	4	0.436627	Admixed
INBRED_305	52.1276	-61.6533	-5.79817	0	0	0.127841	0	0.872158	0	Unknown	5	0.872158	Subpop.5
INBRED_309	53.0107	-61.8898	-4.96552	0	0	0.131234	0	0.868765	0	Unknown	5	0.868765	Subpop.5
K148	41.553	-16.4731	-7.77586	0	0.022288	0.165132	0.37875	0.433829	0	Unknown	5	0.433829	Admixed
K150	25.57	-19.1988	-8.77917	0	0.016698	0.185081	0.357723	0.396801	0.043696	Unknown	5	0.396801	Admixed
K155	36.964	-26.0216	-0.38214	0	0.042152	0.24733	0.298544	0.394984	0.01699	Unknown	5	0.394984	Admixed
K201	25.3885	-17.6415	-14.4953	0	0	0.161848	0.411914	0.396186	0.030051	Unknown	4	0.411914	Admixed
K4	23.0833	-7.36181	-17.5422	2.9e-05	0	0.103826	0.477023	0.3872	0.031921	Unknown	4	0.477023	Admixed
K41	31.1503	-22.7356	-11.4441	0	0	0.230074	0.357962	0.411962	0	Unknown	5	0.411962	Admixed
K47	57.2852	-54.5558	-3.35222	0	0	0.662603	0.114075	0.223321	0	Flint	3	0.662603	Subpop.3
K55	33.6453	-24.7658	-8.15243	0	0	0.204828	0.329619	0.465552	0	Unknown	5	0.465552	Admixed
K64	33.0126	-27.4402	0.147516	0	0.008297	0.134872	0.270225	0.569735	0.01687	Unknown	5	0.569735	Subpop.5
KI11	37.2379	-39.2661	-9.58386	0	0	0	0	0.999998	0	Tropical	5	0.999998	Subpop.5
KI3	42.7113	-40.2246	-18.135	0	0	0	0	0.999998	0	Tropical	5	0.999998	Subpop.5
KI43	48.2971	-40.3192	-3.62185	0	4.4e-05	0	0	0.999955	0	Tropical	5	0.999955	Subpop.5
KO679Y	38.9421	-19.7831	2.4069	0	0.075514	0.072996	0.221289	0.627058	0.003143	Unknown	5	0.627058	Subpop.5
KUNG_70	22.5845	18.3046	-14.185	0	0.118762	0	0.594481	0.286755	0	Unknown	4	0.594481	Subpop.4
KY21	24.9777	-20.8068	-6.38854	0	0	0.203018	0.346256	0.4012	0.049525	Unknown	5	0.4012	Admixed
KY226	23.3801	6.37141	-10.8514	0	0.130315	0	0.354732	0.478107	0.036846	Unknown	5	0.478107	Admixed
KY228	40.9788	-22.6854	-6.68832	0	0.010901	0.208122	0.340302	0.440674	0	Unknown	5	0.440674	Admixed
L_289	45.2199	-22.4404	21.4883	0	0.151437	0.330406	0.194435	0.31999	0.003731	Unknown	3	0.330406	Admixed
L317	43.0734	-0.0334252	13.1894	0.023275	0.129672	0.27096	0.389173	0.186919	0	NSS	4	0.389173	Admixed
LH1	-66.6368	106.197	-42.0653	0.611228	0	0	0	0	0.388771	Not available	1	0.611228	Subpop.1
LH123HT	10.8426	94.5579	105.257	0	0.92912	0	0	0	0.070879	Unknown	2	0.92912	Subpop.2
LH145	-187.658	-82.0561	102.498	0	0	0	0	0	0.999998	SSS	6	0.999998	Subpop.6
LH149	-168.735	5.30361	-111.574	0	0.00719	0.064751	0	0	0.928058	SSS	6	0.928058	Subpop.6
LH38	41.1278	112.908	57.1163	0	0.999998	0	0	0	0	Unknown	2	0.999998	Subpop.2
LH39	36.5187	112.807	51.9944	0	0.999998	0	0	0	0	Unknown	2	0.999998	Subpop.2
LH59	48.6538	107.395	159.122	0	0.999998	0	0	0	0	NSS	2	0.999998	Subpop.2
LH60	45.5271	55.6649	100.012	0	0.670306	0	0.117488	0.212206	0	NSS	2	0.670306	Subpop.2
LH61	39.1084	110.856	168.476	0	0.999998	0	0	0	0	NSS	2	0.999998	Subpop.2
LH82	8.92585	98.0817	-31.9609	0.428046	0.026024	0	0.545929	0	0	Unknown	4	0.545929	Subpop.4
LH93	29.1257	6.50322	5.40195	0.000405	0.156158	0.15346	0.411187	0.260499	0.018292	Unknown	4	0.411187	Admixed
LP5	-171.126	8.7121	-117.144	0	0	0.057825	0	0	0.942174	SSS	6	0.942174	Subpop.6
M14	10.4718	31.5036	-15.0128	0	0.155273	0	0.732413	0.112312	0	Unknown	4	0.732413	Subpop.4
M162W	41.5181	-28.0735	-4.62915	0	0.004013	0.031959	0.193977	0.770049	0	Tropical	5	0.770049	Subpop.5
M37W	36.06	-35.2371	-3.61937	0	0.080558	0	0	0.919441	0	Unknown	5	0.919441	Subpop.5
MBNA	42.0714	98.9259	159.133	0	0.999998	0	0	0	0	Not available	2	0.999998	Subpop.2
MBPM	27.8418	33.3254	25.4833	0	0.412738	0.086479	0.382934	0.097473	0.020376	Not available	2	0.412738	Admixed
MEF156_55_2	56.6211	-49.0281	2.46874	0	0	0.715846	0.209357	0.074796	0	Unknown	3	0.715846	Subpop.3
MO_G	33.9037	-17.7283	2.15166	0.035631	0	0.287568	0.327023	0.349777	0	Unknown	5	0.349777	Admixed
MO15W	42.3486	-21.6891	-3.5969	0	0.040951	0.165537	0.316292	0.477095	0.000124	Unknown	5	0.477095	Admixed
MO17	44.8244	129.893	208.626	0	0.999998	0	0	0	0	Not available	2	0.999998	Subpop.2
MO23W	34.7742	-24.6511	-5.9394	0	0.013792	0.20291	0.340711	0.442586	0	Unknown	5	0.442586	Admixed
MO24W	34.6134	-24.052	-12.1961	0	0.003805	0.185185	0.317264	0.493745	0	Unknown	5	0.493745	Admixed
MO28W	29.6528	-32.3336	-2.0099	0	0	0.175605	0.252204	0.532068	0.040123	Unknown	5	0.532068	Subpop.5
MO3	1.11836	29.0501	-48.4404	0	0	0	0.984265	0	0.015734	Unknown	4	0.984265	Subpop.4
MO30W	7.54242	-33.7424	-1.29752	0	0	0.128189	0.220538	0.527022	0.12425	Unknown	5	0.527022	Subpop.5
MO39	-25.2042	10.1114	-18.1845	0.088369	0.012538	0.132349	0.353682	0.184834	0.228229	Unknown	4	0.353682	Admixed
MO44	13.8035	21.8744	-28.4927	0	0	0.061276	0.938722	0	0	NSS	4	0.938722	Subpop.4
MO45	-14.3902	11.9042	24.4095	0.070746	0.141428	0.054835	0.215567	0.336655	0.180769	Unknown	5	0.336655	Admixed
MO47	-10.1722	-2.04578	12.6993	0.081116	0.125166	0.098832	0	0.493353	0.201533	Unknown	5	0.493353	Admixed
MO5	37.3796	-23.0228	-17.0013	0	0	0.182145	0.354328	0.463525	0	Unknown	5	0.463525	Admixed
MO7	42.1548	-9.80131	-0.318025	7.9e-05	0	0.141472	0.376741	0.481707	0	Unknown	5	0.481707	Admixed
MP339	34.5833	-30.2042	-8.32505	0	0.006025	0.121193	0.244503	0.612116	0.016162	Unknown	5	0.612116	Subpop.5
MS106	16.6025	13.9278	-12.4552	0	0.105609	0.153337	0.539841	0.150665	0.050547	Unknown	4	0.539841	Subpop.4
MS116	25.9803	-13.2672	-4.69646	0	0	0.236916	0.435394	0.327689	0	Unknown	4	0.435394	Admixed
MS12	33.5873	-22.3556	-3.9169	0	0	0.246145	0.317664	0.411903	0.024288	Unknown	5	0.411903	Admixed
MS132	2.40431	15.4714	5.22433	0.019038	0.092151	0.108677	0.637105	0.059842	0.083187	SSS	4	0.637105	Subpop.4
MS142	26.0242	-8.63627	-17.7708	0	0	0.157043	0.563811	0.26125	0.017895	Unknown	4	0.563811	Subpop.4
MS153	35.0392	-7.22376	-18.1845	0	0	0.269625	0.52989	0.198936	0.001548	SSS	4	0.52989	Subpop.4
MS211	33.2878	-21.8441	-3.92162	0	0.021647	0.265577	0.379847	0.33293	0	Unknown	4	0.379847	Admixed
MS221	-168.103	-2.32314	37.0367	0.102876	0	0	0	0	0.897123	Unknown	6	0.897123	Subpop.6
MS222	-170.334	-2.48161	32.9648	0.101835	0	0	0	0	0.898164	Unknown	6	0.898164	Subpop.6
MS223	25.7849	8.49719	-21.8186	0.000339	0	0.122219	0.689042	0.1884	0	Unknown	4	0.689042	Subpop.4
MS224	26.9518	17.2569	13.5329	0	0.281367	0.161376	0.557256	0	0	Unknown	4	0.557256	Subpop.4
MS225	31.5331	20.6744	22.1565	0	0.33634	0.180867	0.46708	0	0.015713	Unknown	4	0.46708	Admixed
MS226	-70.726	-17.2015	61.686	0.023456	0.148681	0.089879	0.196337	0.131149	0.410499	Unknown	6	0.410499	Admixed
MS24A	36.3846	-18.0862	-1.05416	0	0	0.234862	0.367392	0.389646	0.008098	NSS	5	0.389646	Admixed
MS67	43.5156	-15.4073	8.54397	0	0.069388	0.296311	0.382397	0.251902	1e-06	Unknown	4	0.382397	Admixed
MS72	19.9414	-1.03566	-21.5118	0	0.010963	0.123513	0.594795	0.240678	0.030051	Unknown	4	0.594795	Subpop.4
MT42	34.9967	-29.8351	-7.50081	0	0.000123	0.306518	0.367414	0.30941	0.016535	NSS	4	0.367414	Admixed
N193	23.5535	18.7419	-1.24682	0	0.133989	0.14158	0.491365	0.208311	0.024755	Unknown	4	0.491365	Admixed
N199	-2.57154	10.5159	-32.3444	0	0	0.034416	0.718124	0.144682	0.102777	Unknown	4	0.718124	Subpop.4
N209	-98.7979	20.1952	-37.362	0	0	0	0.497303	0	0.502695	Unknown	6	0.502695	Subpop.6
N215	-1.59172	33.0829	-33.445	0	0	0	0.962805	0	0.037193	Unknown	4	0.962805	Subpop.4
N216	-16.1915	40.202	-31.7892	0	0	0	0.930569	0	0.06943	Unknown	4	0.930569	Subpop.4
N217	-209.215	-50.5103	65.2881	0	0	0	0	0	0.999998	Unknown	6	0.999998	Subpop.6
N218	-222.303	-26.547	18.7683	0	0	0	0	0	0.999998	Unknown	6	0.999998	Subpop.6
N28	-86.7495	18.0917	-45.5155	0	0	0	0.496305	0.013789	0.489904	SSS	4	0.496305	Admixed
N28HT	-86.4762	14.0507	-34.2301	0	0	0	0.502023	0.018502	0.479474	SSS	4	0.502023	Subpop.4
N501	-96.464	4.69965	-28.7503	0	0.013575	0.027292	0.43533	0.014579	0.509225	Semi Flint	6	0.509225	Subpop.6
N527	-79.4946	6.79557	-37.3653	0	0	0	0.533103	0.052927	0.413969	Unknown	4	0.533103	Subpop.4
N534	-12.2423	37.2206	-29.6884	0	0	0	0.910291	0.000663	0.089044	Unknown	4	0.910291	Subpop.4
N538	-99.4796	13.3359	-30.4485	0	0	0	0.514224	0	0.485774	Unknown	4	0.514224	Subpop.4
N542	-91.3059	15.7002	-34.191	0	0	0	0.548255	1e-06	0.451743	Unknown	4	0.548255	Subpop.4
N545	-90.0787	15.2152	-31.2987	0	0	0	0.545557	0.000565	0.453877	Unknown	4	0.545557	Subpop.4
N6	28.9172	-9.03183	-14.0725	0.000579	0	0.199019	0.483721	0.301382	0.015299	NSS	4	0.483721	Admixed
N7A	-78.4609	-9.06742	-10.9636	0	0	0	0.587206	0	0.412793	SSS	4	0.587206	Subpop.4
NC13	34.0197	-25.8192	-11.9806	0	0.012581	0.182072	0.289976	0.500458	0.014913	Unknown	5	0.500458	Subpop.5
NC222	36.1674	-23.6168	-2.09389	0	0	0.202828	0.299004	0.485388	0.01278	Unknown	5	0.485388	Admixed
NC230	37.1534	-28.8436	-8.83118	0	0	0.20185	0.28816	0.509989	0	Unknown	5	0.509989	Subpop.5
NC232	35.5907	-11.2695	-11.8545	0	0.029215	0.103712	0.427879	0.439193	0	Unknown	5	0.439193	Admixed
NC236	35.2148	-18.1138	-6.14021	0	0.035151	0.190438	0.331171	0.427471	0.015769	Unknown	5	0.427471	Admixed
NC250	-62.7197	40.3	-26.1592	0.244132	0	0	0	0.318521	0.437346	SSS	6	0.437346	Admixed
NC264	46.0278	-44.1128	-3.61225	0	0	0.141063	0.091654	0.767131	0.000152	NSS	5	0.767131	Subpop.5
NC298	47.0087	-41.7784	-10.3064	0	0	0	0	0.999998	0	Tropical	5	0.999998	Subpop.5
NC318	41.9843	-37.8314	-5.9809	0	0	0.088747	0.147888	0.762342	0.001022	NSS	5	0.762342	Subpop.5
NC340	49.8409	-47.181	-13.3665	0	0	0	0	0.999998	0	Tropical	5	0.999998	Subpop.5
NC342	44.1191	29.5142	90.0918	0	0.56706	0.067722	0.056183	0.309034	0	NSS	2	0.56706	Subpop.2
NC344	49.0703	24.9466	102.75	0	0.608712	0.087946	0.000437	0.302905	0	NSS	2	0.608712	Subpop.2
NC356	49.4017	-41.5319	-12.7305	0	0	0	0	0.999998	0	Tropical	5	0.999998	Subpop.5
NC358	43.4924	-46.6292	-16.803	0	0	0	0	0.999998	0	Tropical	5	0.999998	Subpop.5
NC412	48.8912	-4.6423	47.8932	0	0.295136	0.018705	0	0.686157	0	Tropical/NSS	5	0.686157	Subpop.5
NC472	-74.5467	-5.71689	-66.7186	0	0	0	0	0.510182	0.489817	Tropical/NSS	5	0.510182	Subpop.5
ND1	50.9603	-51.1545	9.52558	0	0.019812	0.647644	0.202481	0.130062	0	Semi Flint	3	0.647644	Subpop.3
ND101	42.8943	-28.6594	-0.848476	0	0.050322	0.439815	0.341588	0.165062	0.003213	Unknown	3	0.439815	Admixed
ND167	38.9687	-24.8885	-6.56017	0	0	0.303374	0.351263	0.345362	0	NSS	4	0.351263	Admixed
ND230	35.4289	-26.2122	-5.27747	0	0	0.277985	0.419961	0.302052	0	NSS	4	0.419961	Admixed
ND246	43.0167	-20.8753	-5.75123	0.001589	0	0.369384	0.37205	0.256976	0	Unknown	4	0.37205	Admixed
ND247	35.1156	-24.9875	-6.50931	0	0	0.287794	0.395719	0.305159	0.011327	Unknown	4	0.395719	Admixed
ND251	36.1966	-33.9224	-0.277507	0	0	0.33789	0.35146	0.286871	0.023778	Unknown	4	0.35146	Admixed
ND260	27.189	-9.66146	-8.23838	0.000176	0	0.239141	0.442384	0.2819	0.036398	Unknown	4	0.442384	Admixed
ND262	25.3019	-16.7328	-1.1938	3.1e-05	0.061521	0.296271	0.360099	0.227434	0.054644	Unknown	4	0.360099	Admixed
ND265	16.9873	-22.1447	-2.38718	0	0	0.278633	0.358871	0.274368	0.088128	Unknown	4	0.358871	Admixed
NO__380	62.4254	-67.9462	13.1606	0	0.023247	0.841111	0.135642	0	0	Flint	3	0.841111	Subpop.3
NP87	61.9893	-81.48	-14.4833	0	0	0.999998	0	0	0	Popcorn	3	0.999998	Subpop.3
NY6371	32.907	-23.2048	-4.8606	0	0	0.097157	0.271801	0.598988	0.032054	Unknown	5	0.598988	Subpop.5
OC19	44.1888	-32.7064	0.303822	0	0.035832	0.354051	0.221015	0.381703	0.007398	Unknown	5	0.381703	Admixed
OH33	24.6775	-3.75109	-16.1057	0	0	0.132841	0.578105	0.269334	0.01972	Unknown	4	0.578105	Subpop.4
OH40B	51.8875	47.2582	68.4	0	0.800236	0.199762	0	0	0	NSS	2	0.800236	Subpop.2
OH43	41.6553	96.2906	63.0891	0	0.999998	0	0	0	0	NSS	2	0.999998	Subpop.2
OH7	-20.7128	-13.2985	-3.27139	0	0	0	0.683363	0.146841	0.169795	Not available	4	0.683363	Subpop.4
OH7B	-25.3864	-0.326265	-9.28115	0	0	0	0.836942	0.009238	0.153818	Unknown	4	0.836942	Subpop.4
OS420	3.2181	21.7736	-45.7205	0	0	0.03242	0.912339	0	0.055239	NSS	4	0.912339	Subpop.4
OS426	6.9711	5.81021	-20.0209	0.020604	0	0.106338	0.522184	0.266172	0.084703	NSS	4	0.522184	Subpop.4
P39	62.4088	-78.2604	20.682	0	0	0.999998	0	0	0	Sweet Corn	3	0.999998	Subpop.3
PA392	12.1953	-11.3467	-25.6985	0	0	0.105855	0.584088	0.249623	0.060433	Unknown	4	0.584088	Subpop.4
PA405	28.2312	-3.3446	-29.4812	0	0	0.136284	0.693239	0.170475	0	Not available	4	0.693239	Subpop.4
PA468	34.3293	5.49473	-9.07049	0	0.086693	0	0.514644	0.398662	0	Unknown	4	0.514644	Subpop.4
PA762	46.2438	74.8605	57.4521	0	0.944327	0	0.055672	0	0	NSS	2	0.944327	Subpop.2
PA778	-18.4534	36.3327	127.671	0	0.709893	0.042663	0	0	0.247443	NSS	2	0.709893	Subpop.2
PA880	21.2595	21.3819	-7.14417	0.003444	0.132285	0	0.519982	0.321372	0.022917	Unknown	4	0.519982	Subpop.4
PA891	24.5733	63.436	5.02684	0	0.343017	0	0.656981	0	0	NSS	4	0.656981	Subpop.4
PHG29	0.308229	207.962	-56.8771	0.999998	0	0	0	0	0	Iodent	1	0.999998	Subpop.1
PHG35	5.06234	91.9427	0.387758	0.3968	0.128667	0	0.474532	0	0	Iodent/Midland	4	0.474532	Admixed
PHG39	-160.475	5.70063	47.1204	0.152194	0	0	0	0	0.847804	Amargo	6	0.847804	Subpop.6
PHG47	27.3094	78.4609	33.1372	0.025815	0.58064	0	0.393544	0	0	NSS	2	0.58064	Subpop.2
PHG50	9.65099	160.378	-44.8279	0.999998	0	0	0	0	0	Iodent	1	0.999998	Subpop.1
PHG72	-59.2627	140.243	-19.0177	0.879365	0	0	0	0	0.120634	Iodent	1	0.879365	Subpop.1
PHG80	-109.156	46.6356	89.8171	0.098882	0.360899	0	0	0	0.540218	SSS	6	0.540218	Subpop.6
PHJ40	-25.0226	55.4437	89.5297	0.12514	0.550935	0	0	0.067623	0.256302	SSS	2	0.550935	Subpop.2
PHK76	30.4739	72.8682	126.728	0	0.95696	0	0	0	0.043039	Unknown	2	0.95696	Subpop.2
PHN11	-2.97374	199.002	-57.7463	0.999998	0	0	0	0	0	Iodent	1	0.999998	Subpop.1
PHR36	17.8869	60.6231	-16.7121	0.284439	0.069223	0.05748	0.451331	0.137527	0	Unknown	4	0.451331	Admixed
PHT55	-149.507	8.71083	37.6133	0.184816	0	0	0	0	0.815183	Amargo	6	0.815183	Subpop.6
PHT77	20.6906	75.5224	69.5176	0.058375	0.666858	0	0.219393	0	0.055373	NSS	2	0.666858	Subpop.2
PHV63	-78.4773	25.0342	63.5078	0.076118	0.31442	0.020781	0	0.146419	0.442262	Unknown	6	0.442262	Admixed
PHW17	-160.656	-2.03719	-75.9733	0	0	0	0	0.17138	0.828618	SSS	6	0.828618	Subpop.6
PHZ51	23.7693	50.8132	43.557	0.103981	0.401361	0.080345	0.379212	0	0.035102	NSS	2	0.401361	Admixed
R101	16.2843	35.561	-22.0065	0.023305	0.090445	0.022853	0.782671	0.067273	0.013453	SSS	4	0.782671	Subpop.4
R113	17.3101	15.068	-23.143	0	0.054977	0.072988	0.763374	0.088578	0.020083	SSS	4	0.763374	Subpop.4
R134	32.5618	-15.066	-6.8098	0	0	0.175634	0.398916	0.417004	0.008446	Unknown	5	0.417004	Admixed
R168	18.5084	8.95152	-20.5051	0	0	0.12231	0.77531	0.082975	0.019404	Unknown	4	0.77531	Subpop.4
R177	31.7167	36.5372	-21.3908	0	0.128101	0.046225	0.772114	0.053559	0	Unknown	4	0.772114	Subpop.4
R181B	15.1897	28.6582	-23.9417	0.041235	0.07877	0.052442	0.664061	0.132071	0.031421	Unknown	4	0.664061	Subpop.4
R197	1.55108	18.3638	-36.0093	0.061716	0	0.078071	0.644183	0.14465	0.07138	Unknown	4	0.644183	Subpop.4
R225	-23.0584	18.004	6.07332	0	0.195046	0	0.553421	0.052318	0.199214	SSS	4	0.553421	Subpop.4
R226	-66.4756	2.56413	11.6353	0	0.092502	0	0.480514	0.057785	0.369199	SSS	4	0.480514	Admixed
R227	-86.4433	24.0799	-60.2044	0	0	0	0.526937	0.000506	0.472557	SSS	4	0.526937	Subpop.4
R229	-194.604	14.4975	-128.794	0	0	0	0	0	0.999998	SSS	6	0.999998	Subpop.6
R30	40.5128	-25.4441	-6.82471	0.000372	0	0.199393	0.32389	0.476344	0	Unknown	5	0.476344	Admixed
R4	3.90606	44.737	-67.0487	0	0	0	0.99984	0	0.000158	NSS	4	0.99984	Subpop.4
R53	36.9021	-24.4333	-6.17638	0	0	0.286188	0.412297	0.301515	0	NSS	4	0.412297	Admixed
R71	15.0939	33.4736	-40.3888	0.019231	0	0	0.980768	0	0	Unknown	4	0.980768	Subpop.4
S_56	69.521	-74.1032	14.1781	0	0.043358	0.95664	0	0	0	Unknown	3	0.95664	Subpop.3
S8324	-176.722	7.54981	-58.2211	0	0.089501	0	0	0	0.910497	SSS	6	0.910497	Subpop.6
SD101	-53.9687	85.9643	-29.8535	0.428502	0.121745	0	0	0.093683	0.35607	Unknown	1	0.428502	Admixed
SD102	-30.6399	137.562	-33.4113	0.855038	0	0	0	0	0.14496	Unknown	1	0.855038	Subpop.1
SD107	-162.004	-69.4104	80.6656	0	0	0.121779	0	0.093346	0.784875	Unknown	6	0.784875	Subpop.6
SD15	21.8616	41.1055	10.8037	0	0.224595	0.094432	0.522297	0.134574	0.024102	Unknown	4	0.522297	Subpop.4
SD40	-48.1141	156.577	-15.8913	0.999998	0	0	0	0	0	Unknown	1	0.999998	Subpop.1
SD42	2.70573	-2.95318	-33.882	0.000347	0	0.124505	0.532359	0.242627	0.100162	Unknown	4	0.532359	Subpop.4
SD44	15.3573	71.2687	-29.3377	0.157773	0.113755	0	0.664867	0.063341	0.000264	Unknown	4	0.664867	Subpop.4
SG_1533	65.0955	-88.4499	-16.8788	0	0	0.999998	0	0	0	Popcorn	3	0.999998	Subpop.3
SG_18	63.1471	-92.5628	-14.4637	0	0	0.999998	0	0	0	Semi Flint	3	0.999998	Subpop.3
SG_30A	62.5582	-86.7617	-15.4437	0	0	0.999998	0	0	0	Popcorn	3	0.999998	Subpop.3
T141	41.3148	-35.6354	-1.66774	0	0	0.366078	0.291207	0.333705	0.00901	Unknown	3	0.366078	Admixed
T146	55.9419	-63.5697	0.898539	0	0	0.364888	0.006597	0.628514	0	Unknown	5	0.628514	Subpop.5
T232	2.48384	-36.9603	-5.48736	0	0	0.084486	0.326022	0.463442	0.126048	Unknown	5	0.463442	Admixed
T234	33.4444	-17.2131	-6.4123	0	0.018772	0.153365	0.403687	0.424175	0	Unknown	5	0.424175	Admixed
T242	38.6666	-41.8098	-6.06664	0	0	0.499934	0.254155	0.217118	0.028793	Unknown	3	0.499934	Admixed
T9	61.2334	-64.7565	19.3264	0	0.011325	0.935261	0.053414	0	0	Flint	3	0.935261	Subpop.3
TR	-13.5513	22.6034	-42.6629	0.008306	0.014629	0.016855	0.643439	0.171259	0.145511	NSS	4	0.643439	Subpop.4
TX303	33.7087	-31.4792	-11.3794	0	0.007774	0.048952	0.19167	0.734052	0.017551	Unknown	5	0.734052	Subpop.5
TZU_CHIAO_HSI_WU_105	43.0619	-20.3593	-15.8683	0	0	0.049608	0.331947	0.618444	0	Unknown	5	0.618444	Subpop.5
U_123	50.4355	-56.1684	6.10463	0	0	0.738841	0.261157	0	0	Flint	3	0.738841	Subpop.3
U267Y	39.3529	-10.6484	-7.62749	0.005822	0	0.059374	0.30904	0.625763	0	Unknown	5	0.625763	Subpop.5
VA102	43.8458	-1.13031	48.867	0	0.307061	0.119857	0.172113	0.400968	0	NSS	5	0.400968	Admixed
VA14	31.6688	30.2372	4.69006	0	0.189412	0	0.537642	0.272946	0	NSS	4	0.537642	Subpop.4
VA38	33.4926	7.86322	18.1155	0	0.225696	0.06577	0.349207	0.359326	0	Unknown	5	0.359326	Admixed
VA52	38.4891	53.4851	58.8469	0	0.516294	0	0.3721	0.111605	0	NSS	2	0.516294	Subpop.2
VA85	27.8479	28.7938	20.47	0	0.310583	0.119362	0.424816	0.145238	0	NSS	4	0.424816	Admixed
VA99	-10.1307	30.734	-1.69155	0	0.146727	0	0.761083	0	0.09219	NSS	4	0.761083	Subpop.4
VAW6	28.7519	13.579	9.33203	0	0.255643	0	0.284832	0.42478	0.034745	Unknown	5	0.42478	Admixed
W_7151	69.0095	-74.6985	17.8963	0	0	0.999998	0	0	0	Sweet Corn	3	0.999998	Subpop.3
W117HT	36.8491	-18.4846	14.1738	0	0.089295	0.279309	0.288046	0.327365	0.015986	NSS	5	0.327365	Admixed
W153R	36.9363	21.1943	3.73081	0.093721	0.165887	0.173433	0.368553	0.198406	0	NSS	4	0.368553	Admixed
W182BN	33.6442	-6.58441	-14.9228	0	0.030837	0.253677	0.596583	0.118902	0	NSS	4	0.596583	Subpop.4
W22	23.3175	29.5933	-53.0418	0	0	0	0.999998	0	0	NSS	4	0.999998	Subpop.4
W23	38.4023	-10.9281	-17.4866	0	0	0.16285	0.558682	0.278467	0	NSS	4	0.558682	Subpop.4
W24	8.1055	16.6979	-15.8355	0.015396	0.056346	0.087438	0.52514	0.23767	0.07801	Unknown	4	0.52514	Subpop.4
W32	22.1965	21.3534	-49.4788	0	0	0	0.999998	0	0	NSS	4	0.999998	Subpop.4
W37A	27.2847	12.7596	-39.2646	0	0	0.158425	0.841574	0	0	NSS	4	0.841574	Subpop.4
W59E	36.7143	-14.5788	4.09845	0	0.080717	0.31656	0.337226	0.251787	0.013711	NSS	4	0.337226	Admixed
W601S	34.1021	50.0254	96.3032	0	0.642131	0.019524	0.095089	0.21831	0.024946	NSS	2	0.642131	Subpop.2
W603S	33.7348	52.5764	102.546	0	0.746382	0.041796	0.054668	0.121623	0.035531	NSS	2	0.746382	Subpop.2
W604S	-117.549	43.5684	24.1529	0.232733	0.158977	0	0	0	0.608288	NSS	6	0.608288	Subpop.6
W605S	43.211	69.569	107.223	0	0.856447	0	0	0.143552	0	NSS	2	0.856447	Subpop.2
W606S	21.4171	108.35	54.6932	0.10049	0.866464	0	0	0	0.033044	NSS	2	0.866464	Subpop.2
W607S	13.6152	118.954	1.17448	0.593715	0.220443	0	0.121069	0.064773	0	NSS	1	0.593715	Subpop.1
W608S	31.9877	47.1525	8.18387	0.091905	0.343809	0	0.191737	0.369208	0.003341	NSS	5	0.369208	Admixed
W610S	-132.112	17.2421	-62.0348	0.087696	0	0.011386	0	0.155365	0.745552	SSS	6	0.745552	Subpop.6
W611S	29.6599	39.698	89.5323	0	0.680919	0.068176	0	0.250905	0	NSS	2	0.680919	Subpop.2
W612S	26.7989	39.6924	97.817	0	0.66811	0	0.034808	0.228148	0.068933	NSS	2	0.66811	Subpop.2
W64A	10.0764	73.8566	0.234577	0	0.279903	0	0.710982	0.009113	0	NSS	4	0.710982	Subpop.4
W703	38.0822	-41.3136	2.08623	0	0.022453	0.467526	0.246236	0.235268	0.028517	Unknown	3	0.467526	Admixed
W803G	18.7314	-7.9135	21.6183	0	0.175926	0	0.157904	0.586257	0.079913	NSS	5	0.586257	Subpop.5
W809G	-147.064	-0.0920289	-85.4256	0	0.007499	0.051813	0	0.153161	0.787527	SSS	6	0.787527	Subpop.6
W810G	30.7745	75.6033	5.83419	0.299127	0.289177	0	0.173831	0.237865	0	NSS	1	0.299127	Admixed
W812G	-125.734	27.8895	-69.0925	0.148751	0	0	0	0.185883	0.665365	SSS	6	0.665365	Subpop.6
W813G	-195.78	-64.199	47.7474	0	0	0	0	0.104496	0.895503	SSS	6	0.895503	Subpop.6
W814G	-33.5123	24.0823	11.5368	0.110158	0.117052	0	0.294489	0.242039	0.236262	NSS	4	0.294489	Admixed
W815G	18.6046	60.1666	48.1028	0.185083	0.440423	0	0	0.374493	0	NSS	2	0.440423	Admixed
W816G	22.2965	71.5993	42.9966	0.128729	0.465102	0	0.203287	0.185789	0.017093	NSS	2	0.465102	Admixed
W817G	22.7297	71.9679	51.9231	0.103551	0.515171	0	0.23257	0.148707	0	NSS	2	0.515171	Subpop.2
W818G	-170.022	-28.0215	-19.2904	0	0	0	0	0.177068	0.82293	SSS	6	0.82293	Subpop.6
W819G	-188.858	-16.3649	-32.9846	0	0	0	0	0.088013	0.911985	SSS	6	0.911985	Subpop.6
W820G	-147.905	-13.9131	-47.1203	0	0	0	0	0.218746	0.781252	SSS	6	0.781252	Subpop.6
W821G	21.7371	106.586	51.8291	0.134593	0.865406	0	0	0	0	NSS	2	0.865406	Subpop.2
W9	42.7028	-32.2877	-17.4791	0	0	0.323975	0.36756	0.308465	0	NSS	4	0.36756	Admixed
WD	43.0089	-30.4332	-0.0759401	0	0.017361	0.429299	0.334874	0.218466	0	NSS	3	0.429299	Admixed
WR3	26.6211	-6.11503	-15.9133	0	0	0.157792	0.610136	0.232072	0	NSS	4	0.610136	Subpop.4
WU_TAN_TZAO	36.3654	-10.2672	-23.0181	0	0	0.0752	0.450227	0.474572	0	Unknown	5	0.474572	Admixed
WXB6	-18.1752	57.4047	-29.41	0.276588	0.008337	0	0.508264	0.0862	0.12061	Unknown	4	0.508264	Subpop.4
33_16	36.0243	-18.1206	-1.6447	0	0	0.186982	0.365375	0.447642	0	Unknown	5	0.447642	Admixed
38_11	6.53887	33.9238	-49.1922	0	0	0	0.999998	0	0	Unknown	4	0.999998	Subpop.4
38_11_GOODMAN_BUCKLER	7.81588	30.0816	-48.3347	0	0	0	0.999998	0	0	Not available	4	0.999998	Subpop.4
4226	26.6338	-9.52611	-18.5148	0	0	0.185217	0.491645	0.30227	0.020868	Unknown	4	0.491645	Admixed
4578_INBRED	59.1965	-9.71347	67.7588	0	0.373688	0.156156	0	0.470156	0	Unknown	5	0.470156	Admixed
4676A	-110.359	-2.57913	23.5962	0.025029	0.049348	0	0.252147	0.088585	0.584891	Not available	6	0.584891	Subpop.6
4722	54.9531	-69.6388	-4.95787	0.000222	0	0.913382	0.086395	0	0	Popcorn	3	0.913382	Subpop.3
4F_35_BK	49.2018	-55.0079	-3.97356	0	0	0.219364	0	0.780635	0	Unknown	5	0.780635	Subpop.5
52220	49.1204	-37.1794	-9.3392	0	0	0.069584	0.100054	0.830362	0	Not available	5	0.830362	Subpop.5
740	46.4374	111.695	188.639	0	0.999998	0	0	0	0	Not available	2	0.999998	Subpop.2
78371A	47.3063	87.9704	113.643	0	0.999998	0	0	0	0	Not available	2	0.999998	Subpop.2
80_2	53.6251	-30.7818	11.7148	0	0.099105	0.490276	0.152418	0.2582	0	Unknown	3	0.490276	Admixed
YANG	54.4483	-62.152	-9.60797	0	0	0.093313	0	0.906685	0	Unknown	5	0.906685	Subpop.5
YE_4	52.1708	-58.8815	-11.4592	0	0	0	0	0.999998	0	Unknown	5	0.999998	Subpop.5
YE_CHI_HUNG	58.9398	-65.3133	-8.01043	0	0	0.133195	0	0.866803	0	Unknown	5	0.866803	Subpop.5
YELLOW_3_4	56.0816	-67.3858	-9.6805	0	0	0.045438	0	0.95456	0	Unknown	5	0.95456	Subpop.5
YING_55	31.62	-19.4348	-13.8807	0	0	0.210009	0.386829	0.380399	0.022763	Unknown	4	0.386829	Admixed
YONG_28	43.3338	-34.7193	-2.86666	0	0	0.197001	0.206827	0.596171	0	Unknown	5	0.596171	Subpop.5
YU796_NS	31.3819	2.19869	46.4538	0	0.290345	0.180536	0.226137	0.302981	0	Unknown	5	0.302981	Admixed
